# Supplementary material for: Online Respondent-Driven Sampling for Studying Contact Patterns Relevant for the Spread of Close-Contact Pathogens: A Pilot Study in Thailand
Source: PubMed Central journal article supplement (PMC3885693; doi:10.1371/journal.pone.0085256), 2014-01-08

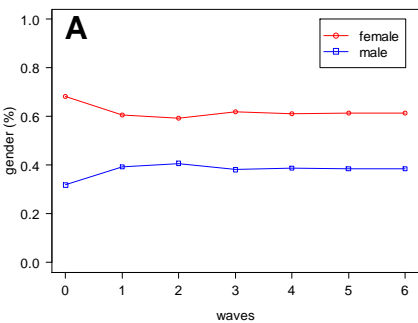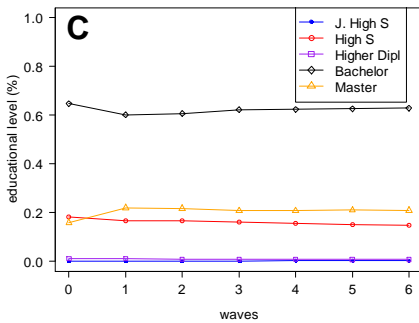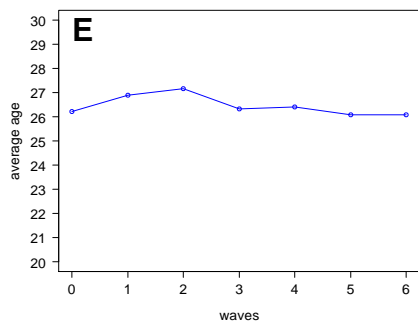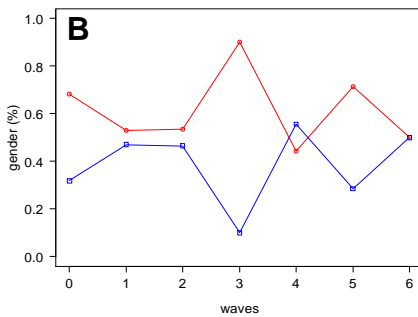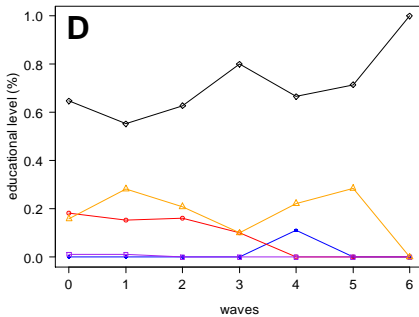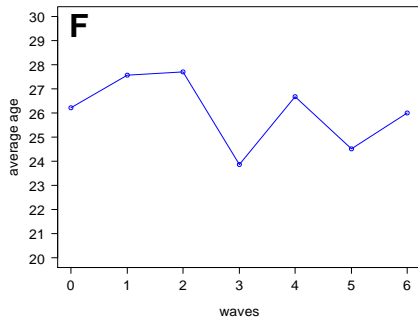

Supplement: pone.0085256.s001.pdf [file pone.0085256.s001.pdf]
