# Supplementary material for: Online Respondent-Driven Sampling for Studying Contact Patterns Relevant for the Spread of Close-Contact Pathogens: A Pilot Study in Thailand
Source: PubMed Central journal article supplement (PMC3885693; doi:10.1371/journal.pone.0085256), 2014-01-08
Supplement: pone.0085256.s003.pdf [file pone.0085256.s003.pdf]

**Table S1. Number of participants and used recruitment options over waves.**

|                                                                        | <b>Wave 0</b> | <b>Wave 1</b> | <b>Wave 2</b> | <b>Wave 3</b> | <b>Wave 4</b> | <b>Wave 5</b> | <b>Wave 6</b> | <b>Total</b> |
|------------------------------------------------------------------------|---------------|---------------|---------------|---------------|---------------|---------------|---------------|--------------|
| Number of trees with                                                   | 45            | 29            | 10            | 3             | 0             | 0             | 2             | 89           |
| Number of participants in                                              | 89            | 86            | 43            | 21            | 9             | 7             | 2             | 257          |
| Number of incomplete responses (persons who provided DI <sup>a</sup> ) | 9 (7)         | 12 (11)       | 6 (6)         | 7 (6)         | 2 (2)         | 1 (0)         | 0 (0)         | 37 (32)      |
| Filled in during weekday <sup>b</sup> (% per wave)                     | 65 (73.0)     | 61 (71.8)     | 35 (81.4)     | 17 (85.0)     | 7 (87.5)      | 2 (33.3)      | 1 (50.0)      | 188 (74.3)   |
| Filled in during weekend <sup>b</sup> (% per wave)                     | 24 (27.0)     | 24 (28.2)     | 8 (18.6)      | 3 (15.0)      | 1 (12.5)      | 4 (66.7)      | 1 (50.0)      | 65 (25.7)    |
| Yesterday was a weekday <sup>b</sup> (% per wave)                      | 55 (61.8)     | 57 (67.1)     | 29 (67.4)     | 9 (45.0)      | 5 (62.5)      | 3 (50.0)      | 1 (50.0)      | 159 (62.8)   |
| Yesterday was a weekend day <sup>b</sup> (% per wave)                  | 34 (38.2)     | 28 (32.9)     | 14 (32.6)     | 11 (55.0)     | 3 (37.5)      | 3 (50.0)      | 1 (50.0)      | 94 (37.2)    |
| Recruited by email <sup>c</sup> (% per wave)                           | 73 (82.0)     | 22 (25.6)     | 9 (20.9)      | 0 (0)         | 0 (0)         | 0 (0)         | 0 (0)         | 104 (40.5)   |
| Recruited by Facebook <sup>c</sup> (% per wave)                        | 0 (0)         | 64 (74.4)     | 34 (79.1)     | 21 (100)      | 9 (100)       | 7 (100)       | 2 (100)       | 136 (52.9)   |
| Through registration page <sup>c</sup> (% per wave)                    | 16 (18.0)     | 0 (0)         | 0 (0)         | 0 (0)         | 0 (0)         | 0 (0)         | 0 (0)         | 16 (6.2)     |
| RO Facebook <sup>d</sup> (% per wave)                                  | 46 (51.7)     | 31 (36.0)     | 18 (41.9)     | 9 (42.9)      | 7 (77.8)      | 5 (71.4)      | 0 (0)         | 116 (45.1)   |
| RO indirect email <sup>d</sup> (% per wave)                            | 10 (11.2)     | 4 (4.6)       | 0 (0)         | 0 (0)         | 0 (0)         | 0 (0)         | 0 (0)         | 14 (5.4)     |
| RO direct email <sup>d</sup> (% per wave)                              | 9 (10.1)      | 4 (4.6)       | 2 (4.6)       | 0 (0)         | 0 (0)         | 0 (0)         | 0 (0)         | 15 (5.8)     |
| Did not recruit (% per wave)                                           | 24 (27.0)     | 47 (54.7)     | 23 (53.5)     | 12 (57.1)     | 2 (22.2)      | 2 (28.6)      | 2 (100)       | 112 (43.6)   |

**a)** Participants provided demographic info (DI): gender, age and educational level, but no information on their contacts. **b)** Weekday is Monday to Friday; weekend is Saturday and Sunday. **c)** Includes respondents who did not complete the questionnaire. **d)** Recruitment option (RO) used by participant to recruit contacts.
