# Supplementary material for: Online Respondent-Driven Sampling for Studying Contact Patterns Relevant for the Spread of Close-Contact Pathogens: A Pilot Study in Thailand
Source: PLOS journal article supplement (doi:10.1371/journal.pone.0085256), 2014-01-08
Supplement: S4 (10.1371/journal.pone.0085256.s004) [file journal.pone.0085256.s004]

**Table S2. The number of contacts while having food (mean, median, SD) younger, same age or older than participant.**

| <b>Age group</b> | <b>Younger</b> | <b>Same age</b> | <b>Older</b>    |
|------------------|----------------|-----------------|-----------------|
| 14-19            | 12.4 (0; 27.8) | 27.3 (15; 33.5) | 27.3 (12; 29.9) |
| 20-29            | 1.5 (0; 3.4)   | 6.1 (3; 9.5)    | 4.6 (2; 7.8)    |
| 30-39            | 4.4 (3; 4.1)   | 3.0 (1; 5.1)    | 3.0 (2; 3.9)    |
| 40+              | 5.0 (4; 5.4)   | 3.0 (0; 5.8)    | 3.8 (2; 5.7)    |

**Note:** Number of contacts while eating was censored to a maximum of 75 contacts per day for each respondent.
